# Supplementary material for: COVID-19 Infection Among Women in Iran Exposed vs Unexposed to Children Who Received Attenuated Poliovirus Used in Oral Polio Vaccine
Source: PubMed Central journal article supplement (PMC8613592; doi:10.1001/jamanetworkopen.2021.35044), 2021-11-24
Supplement: jamanetwopen-e2135044-s001.pdf [file jamanetwopen-e2135044-s001.pdf]

## Supplemental Online Content

Habibzadeh F, Sajadi MM, Chumakov K, et al. COVID-19 infection among women in Iran exposed vs unexposed to children who received attenuated poliovirus used in oral polio vaccine. *JAMA Netw Open*. 2021;4(11):e2135044.  
doi:10.1001/jamanetworkopen.2021.35044

**eFigure 1.** Age Distribution of the Study Population Stratified by Residence Place

**eFigure 2.** Number of New Cases of COVID-19 per 10 000 People Reported During the Study Period, Stratified by Residence Place

**eFigure 3.** QQ-Plots of the 4 Studied Continuous Variables

**eAppendix.** Supplementary Methods

This supplemental material has been provided by the authors to give readers additional information about their work.

**eFigure 1.** Age Distribution of the Study Population Stratified by Residence Place

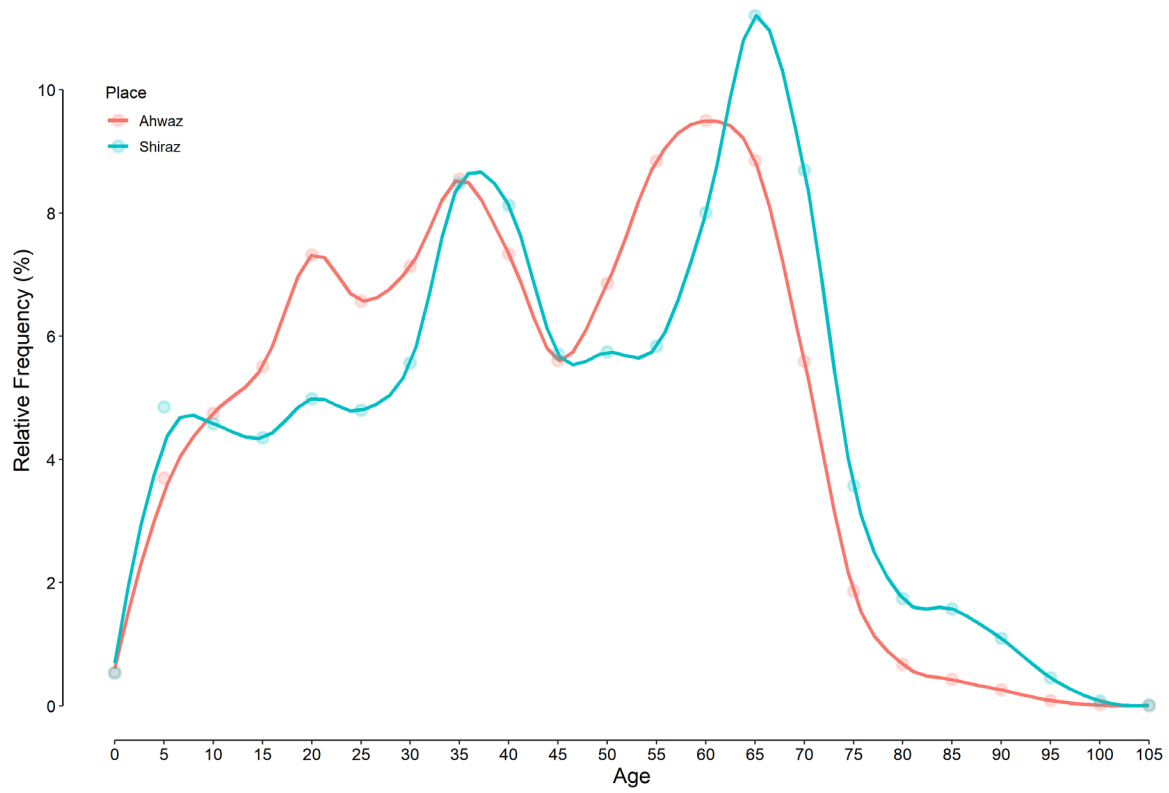

**eFigure 2.** Number of New Cases of COVID-19 per 10 000 People Reported During the Study Period, Stratified by Residence Place

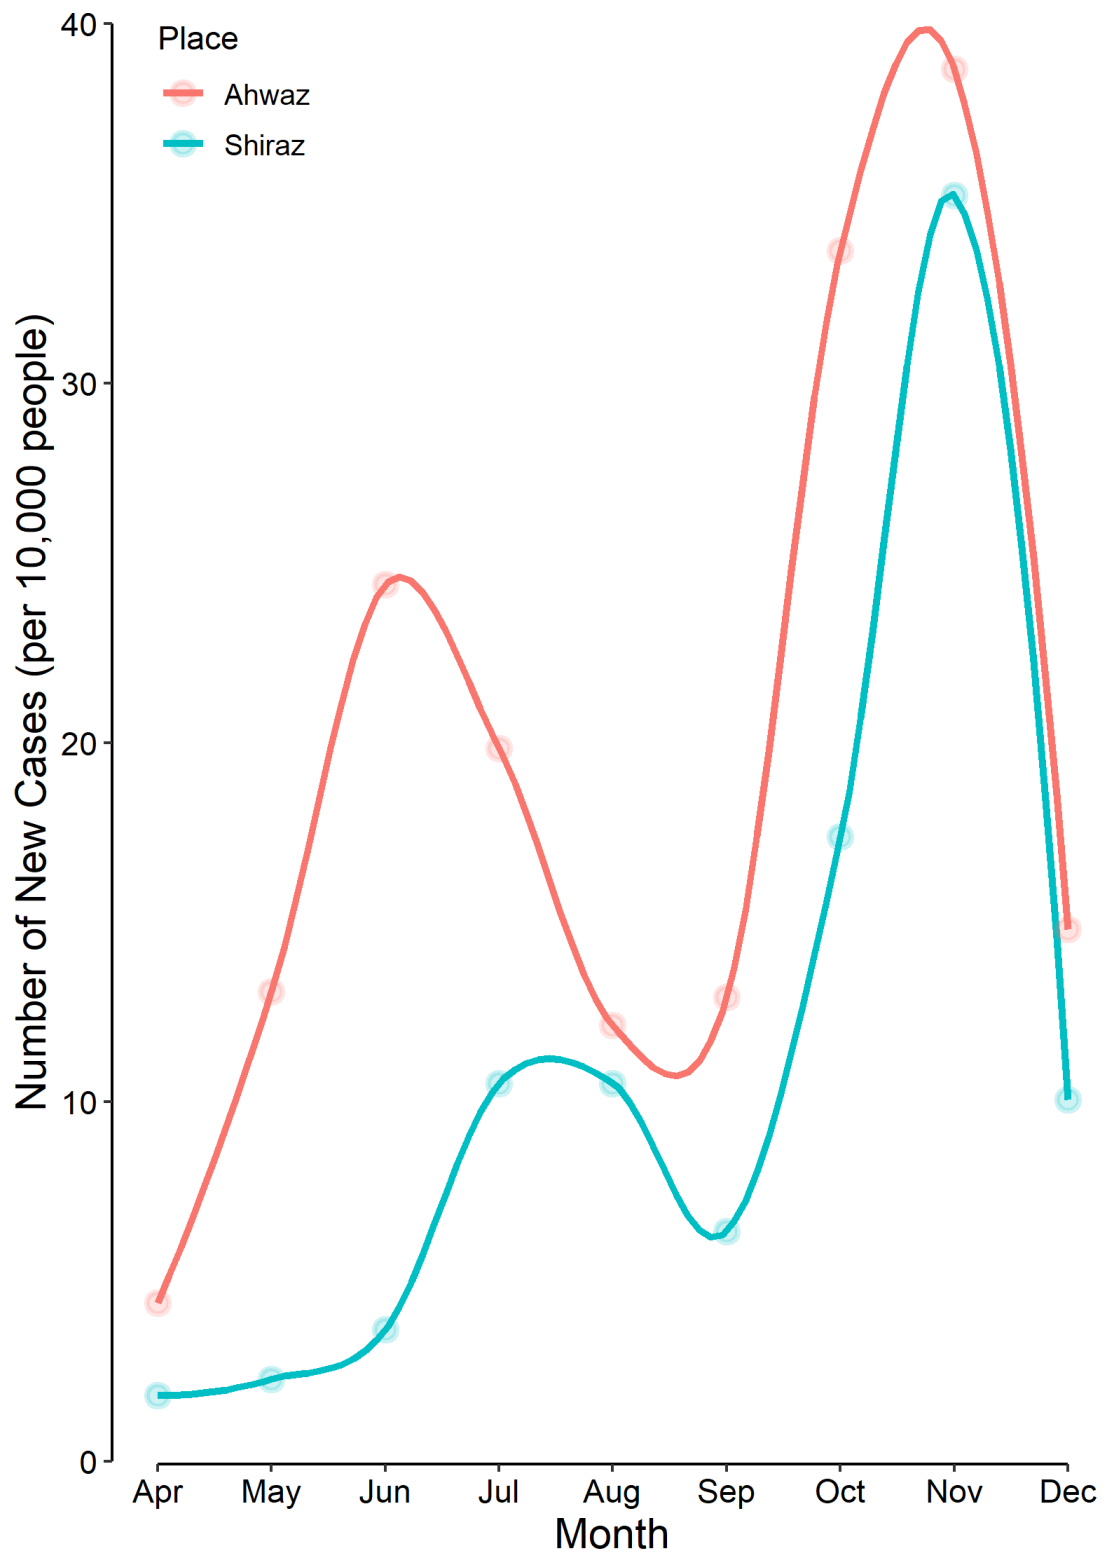

**eFigure 3.** QQ-Plots of the 4 Studied Continuous Variables

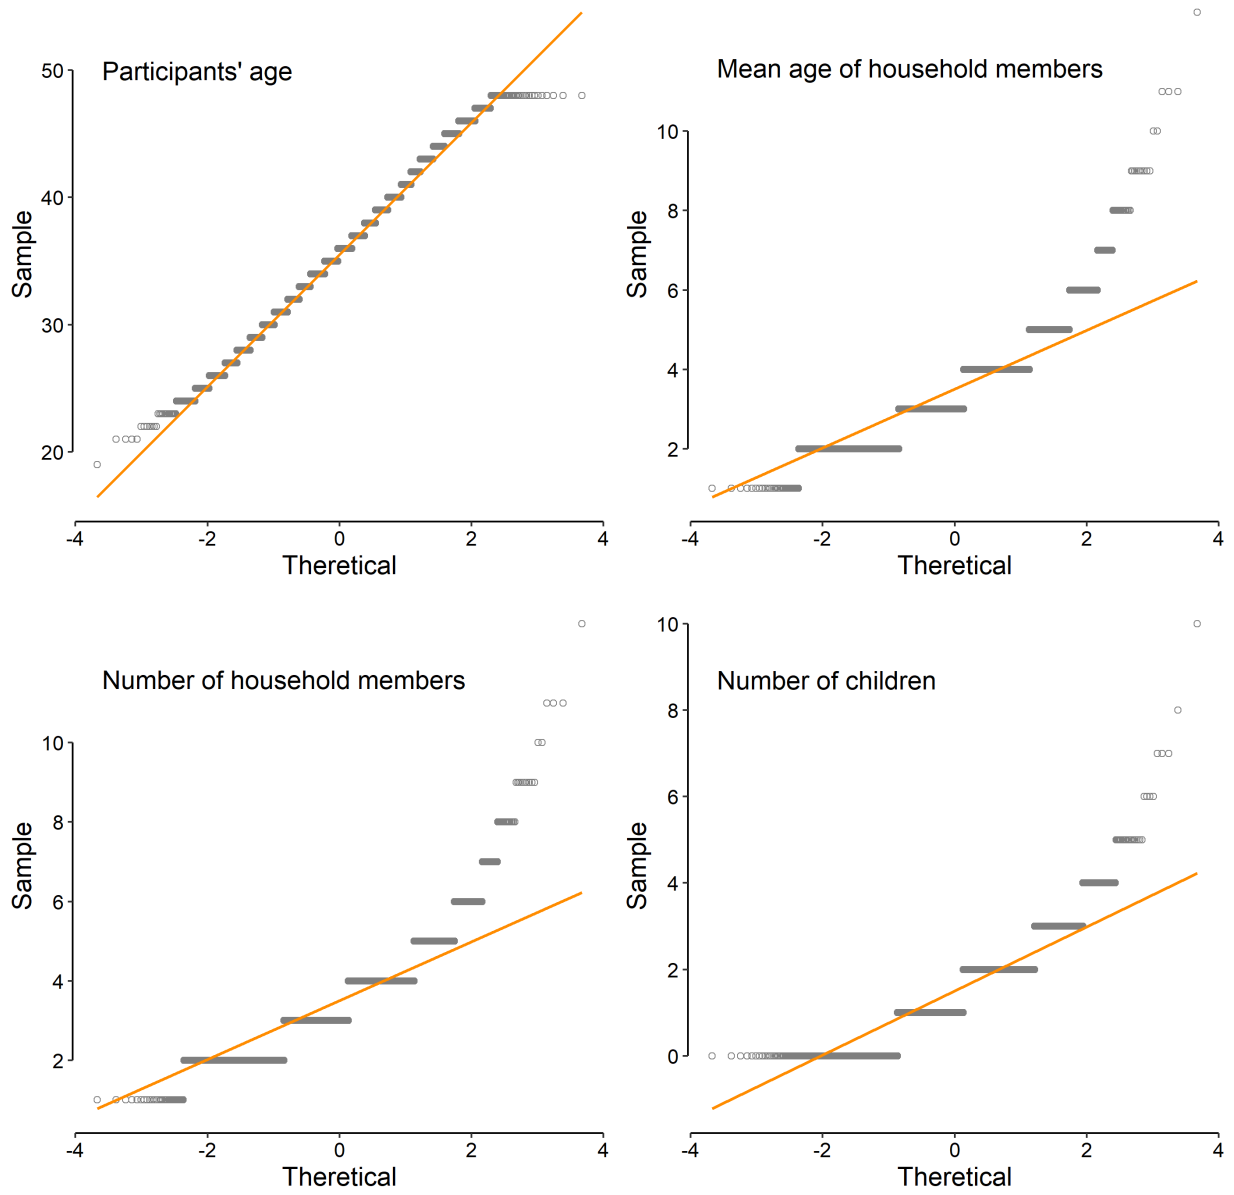

## eAppendix. Supplementary Methods

### Data dictionary

|       |                                       |          |                                   |
|-------|---------------------------------------|----------|-----------------------------------|
| Place | Residence city (Ahwaz or Shiraz)      | Age      | Participants' age (years)         |
| Time  | time-to-event (days)                  | meanAge  | Mean age of the household members |
| COVID | Disease status                        | n        | Number of the household members   |
| Rx    | Exposure status, exposed or unexposed | childNum | Number of children                |

### Welch t test for independent groups

```
t.test(dd$Age ~ dd$Rx) # comparing means of participants' age in exposed and unexposed groups
```

```
Welch Two Sample t-test

data: dd$Age by dd$Rx
t = 1.0275, df = 528.78, p-value = 0.3046
alternative hypothesis: true difference in means is not equal to 0
95 percent confidence interval:
 -0.2401112  0.7667620
sample estimates:
mean in group Not exposed      mean in group Exposed
      35.71917                  35.45585
```

### Matching

```
d %>% # d contains the data for all study population
  filter(Place == "Ahwaz") -> d_Ahwaz
```

```
d %>%
  filter(Place == "Shiraz") -> d_Shiraz
```

```
ratio = 9
```

```
matchit(formula = as.logical(Rx) ~ Age + meanAge + childNum +
  n, data = d_Ahwaz, method = "nearest", replace = FALSE, ratio = ratio)
```

```
Summary of Balance for All Data:
```

|          | Means Treated | Means Control | Std. Mean Diff. | Var.   | Ratio  | eCDF Mean |
|----------|---------------|---------------|-----------------|--------|--------|-----------|
| distance | 0.0579        | 0.0356        | 0.3812          | 4.6736 | 0.1877 |           |
| Age      | 35.9549       | 39.2508       | -0.6635         | 0.6846 | 0.1156 |           |
| meanAge  | 27.2583       | 31.0691       | -0.6572         | 0.6669 | 0.1104 |           |
| childNum | 1.6270        | 1.5268        | 0.0870          | 1.2267 | 0.0165 |           |
| n        | 3.7500        | 3.5551        | 0.1370          | 1.5462 | 0.0209 |           |

```
eCDF Max
distance 0.3253
Age      0.2754
meanAge 0.3082
childNum 0.0478
n        0.0531
```

```
Summary of Balance for Matched Data:
```

|          | Means Treated | Means Control | Std. Mean Diff. | Var.   | Ratio  | eCDF Mean |
|----------|---------------|---------------|-----------------|--------|--------|-----------|
| distance | 0.0579        | 0.0541        | 0.0643          | 3.0685 | 0.0010 |           |
| Age      | 35.9549       | 35.5364       | 0.0842          | 0.7781 | 0.0204 |           |
| meanAge  | 27.2583       | 27.3047       | -0.0080         | 1.0189 | 0.0130 |           |
| childNum | 1.6270        | 1.5168        | 0.0956          | 1.0807 | 0.0113 |           |
| n        | 3.7500        | 3.5774        | 0.1213          | 1.3065 | 0.0145 |           |

```
eCDF Max Std. Pair Dist.
distance 0.0137 0.0669
Age      0.0578 0.6786
meanAge 0.0606 0.5158
childNum 0.0524 0.8246
n        0.0533 0.7443
```

```
Percent Balance Improvement:
```

|          | Std. Mean Diff. | Var. | Ratio | eCDF Mean | eCDF Max |
|----------|-----------------|------|-------|-----------|----------|
| distance | 83.1            | 27.3 | 99.4  | 95.8      |          |
| Age      | 87.3            | 33.8 | 82.3  | 79.0      |          |

|          |      |      |      |      |
|----------|------|------|------|------|
| meanAge  | 98.8 | 95.4 | 88.2 | 80.3 |
| childNum | -9.9 | 62.0 | 31.1 | -9.6 |
| n        | 11.4 | 38.7 | 30.5 | -0.4 |

Sample Sizes:

|           |         |         |
|-----------|---------|---------|
|           | Control | Treated |
| All       | 6460    | 244     |
| Matched   | 2196    | 244     |
| Unmatched | 4264    | 0       |
| Discarded | 0       | 0       |

Percent Balance Improvement:

|          |      |            |      |       |           |          |
|----------|------|------------|------|-------|-----------|----------|
|          | Std. | Mean Diff. | Var. | Ratio | eCDF Mean | eCDF Max |
| distance | 83.1 |            | 27.3 |       | 99.4      | 95.8     |
| Age      | 87.3 |            | 33.8 |       | 82.3      | 79.0     |
| meanAge  | 98.8 |            | 95.4 |       | 88.2      | 80.3     |
| childNum | -9.9 |            | 62.0 |       | 31.1      | -9.6     |
| n        | 11.4 |            | 38.7 |       | 30.5      | -0.4     |

Sample Sizes:

|           |         |         |
|-----------|---------|---------|
|           | Control | Treated |
| All       | 6460    | 244     |
| Matched   | 2196    | 244     |
| Unmatched | 4264    | 0       |
| Discarded | 0       | 0       |

matchit(formula = as.logical(Rx) ~ Age + meanAge + childNum +  
n, data = d\_Shiraz, method = "nearest", replace = FALSE, ratio = ratio)

Summary of Balance for All Data:

|          |               |               |      |            |      |        |           |
|----------|---------------|---------------|------|------------|------|--------|-----------|
|          | Means Treated | Means Control | Std. | Mean Diff. | Var. | Ratio  | eCDF Mean |
| distance | 0.1104        | 0.0651        |      | 0.6788     |      | 1.6780 | 0.2078    |
| Age      | 34.7600       | 38.6692       |      | -0.8077    |      | 0.7181 | 0.1396    |
| meanAge  | 26.8134       | 30.9354       |      | -0.6606    |      | 0.7909 | 0.1196    |
| childNum | 1.2171        | 1.3739        |      | -0.1657    |      | 1.1109 | 0.0297    |
| n        | 3.1886        | 3.4203        |      | -0.2225    |      | 0.9820 | 0.0274    |
|          | eCDF Max      |               |      |            |      |        |           |
| distance | 0.3457        |               |      |            |      |        |           |
| Age      | 0.3046        |               |      |            |      |        |           |
| meanAge  | 0.2708        |               |      |            |      |        |           |
| childNum | 0.1374        |               |      |            |      |        |           |
| n        | 0.1530        |               |      |            |      |        |           |

Summary of Balance for Matched Data:

|          |               |                 |      |            |      |        |           |
|----------|---------------|-----------------|------|------------|------|--------|-----------|
|          | Means Treated | Means Control   | Std. | Mean Diff. | Var. | Ratio  | eCDF Mean |
| distance | 0.1104        | 0.0886          |      | 0.3263     |      | 1.8878 | 0.0530    |
| Age      | 34.7600       | 35.9740         |      | -0.2508    |      | 1.0692 | 0.0434    |
| meanAge  | 26.8134       | 28.0075         |      | -0.1914    |      | 1.4112 | 0.0404    |
| childNum | 1.2171        | 1.2362          |      | -0.0201    |      | 1.2807 | 0.0220    |
| n        | 3.1886        | 3.2254          |      | -0.0354    |      | 1.2384 | 0.0188    |
|          | eCDF Max      | Std. Pair Dist. |      |            |      |        |           |
| distance | 0.1879        | 0.3296          |      |            |      |        |           |
| Age      | 0.1098        | 0.7168          |      |            |      |        |           |
| meanAge  | 0.1479        | 0.7293          |      |            |      |        |           |
| childNum | 0.0698        | 0.8979          |      |            |      |        |           |
| n        | 0.0717        | 0.8924          |      |            |      |        |           |

Percent Balance Improvement:

|          |      |            |         |       |           |          |
|----------|------|------------|---------|-------|-----------|----------|
|          | Std. | Mean Diff. | Var.    | Ratio | eCDF Mean | eCDF Max |
| distance | 51.9 |            | -22.8   |       | 74.5      | 45.6     |
| Age      | 68.9 |            | 79.8    |       | 68.9      | 63.9     |
| meanAge  | 71.0 |            | -46.9   |       | 66.2      | 45.4     |
| childNum | 87.8 |            | -135.2  |       | 26.1      | 49.2     |
| n        | 84.1 |            | -1075.3 |       | 31.6      | 53.1     |

Sample Sizes:

|           |         |         |
|-----------|---------|---------|
|           | Control | Treated |
| All       | 2391    | 175     |
| Matched   | 1575    | 175     |
| Unmatched | 816     | 0       |
| Discarded | 0       | 0       |

## Kaplan-Meier survival plot (Fig 2)

```
fit <- survfit(formula = Surv(Time, as.integer(COVID)) ~ Rx, data = dd, type = "kaplan-meier")
# dd contains the matched study participants
```

```

Rx=Not exposed
time n.risk n.event survival std.err lower 95% CI upper 95% CI
48 3771 1 1.000 0.000265 0.999 1.000
66 3770 1 0.999 0.000375 0.999 1.000
71 3769 1 0.999 0.000459 0.998 1.000
99 3768 1 0.999 0.000530 0.998 1.000
137 3767 1 0.999 0.000593 0.998 1.000
160 3766 1 0.998 0.000649 0.997 1.000
167 3765 1 0.998 0.000701 0.997 1.000
187 3764 1 0.998 0.000749 0.996 0.999
191 3763 1 0.998 0.000795 0.996 0.999
195 3762 1 0.997 0.000837 0.996 0.999
200 3761 1 0.997 0.000878 0.995 0.999
205 3760 1 0.997 0.000917 0.995 0.999
206 3759 1 0.997 0.000954 0.995 0.998
209 3758 1 0.996 0.000990 0.994 0.998
218 3757 1 0.996 0.001025 0.994 0.998
229 3756 2 0.995 0.001091 0.993 0.998
233 3754 1 0.995 0.001122 0.993 0.997
235 3753 1 0.995 0.001153 0.993 0.997
236 3752 2 0.994 0.001212 0.992 0.997
240 3750 1 0.994 0.001240 0.992 0.997
246 3749 1 0.994 0.001268 0.991 0.996
250 3748 2 0.993 0.001322 0.991 0.996
263 3746 1 0.993 0.001347 0.990 0.996
271 3745 2 0.993 0.001398 0.990 0.995

Rx=Exposed
time n.risk n.event survival std.err lower 95% CI upper 95% CI
```

```
ds <- data.frame(time = fit$time, n.risk = fit$n.risk, n.event = fit$n.event,
n.censor = fit$n.censor, surv = fit$surv, upper = fit$upper, lower = fit$lower)
```

```

autoplot(fit, censor.shape = "", conf.int.alpha = 0.1) +
scale_x_continuous(breaks=seq(0, duration, 30), labels = c("Mar", "Apr", "May", "Jun", "Jul",
"Aug", "Sep", "Oct", "Nov", "Dec")) +
scale_y_continuous(breaks=seq(0.990, 1.00, 0.002)) +
theme_classic() +
labs(x = "Time", y = "Survival Probability") +
theme(panel.grid.major.y = element_blank(), panel.grid.minor.y = element_blank(),
panel.grid.major.x = element_blank(), panel.grid.minor.x = element_blank(),
axis.text = element_text(size = rel(1), color = "black"),
axis.title = element_text(size = rel(1.4)),
legend.position = c(0.03, 0.05),
legend.justification = c("left", "bottom"), aspect.ratio = 5/4,
legend.text = element_text(size = rel(0.9))) +
guides(x = "axis_truncated", y = "axis_truncated") +
guides(color = guide_legend(title = "OPV"), fill = guide_legend(title = "OPV"))
```

## Cox regression analysis

```
res.cox <- coxph(Surv(Time, as.integer(COVID)) ~ Rx + Age + Place + n + meanAge, data = dd)
```

```

n= 4190, number of events= 28
      coef exp(coef) se(coef) z Pr(>|z|)
RxYes -1.613e+01 9.920e-08 3.567e+03 -0.005 0.996
Age 2.844e-02 1.029e+00 4.609e-02 0.617 0.537
PlaceShiraz 3.087e-01 1.362e+00 3.865e-01 0.799 0.424
n -3.363e-02 9.669e-01 2.195e-01 -0.153 0.878
meanAge 5.999e-03 1.006e+00 3.923e-02 0.153 0.878

exp(coef) exp(-coef) lower .95 upper .95
```

|             |           |           |        |       |
|-------------|-----------|-----------|--------|-------|
| RxYes       | 9.920e-08 | 1.008e+07 | 0.0000 | Inf   |
| Age         | 1.029e+00 | 9.720e-01 | 0.9400 | 1.126 |
| PlaceShiraz | 1.362e+00 | 7.344e-01 | 0.6384 | 2.904 |
| n           | 9.669e-01 | 1.034e+00 | 0.6289 | 1.487 |
| meanAge     | 1.006e+00 | 9.940e-01 | 0.9316 | 1.086 |

Concordance= 0.582 (se = 0.05 )  
 Likelihood ratio test= 2.88 on 5 df, p=0.7  
 Wald test = 1.38 on 5 df, p=0.9  
 Score (logrank) test = 2.16 on 5 df, p=0.8

*Test of proportional hazards assumption*

test.ph <- cox.zph(res.cox, transform="identity")

|         | chisq    | df | p    |
|---------|----------|----|------|
| Rx      | 6.73e-08 | 1  | 1.00 |
| Age     | 3.68e-01 | 1  | 0.54 |
| Place   | 2.34e-01 | 1  | 0.63 |
| n       | 2.36e-01 | 1  | 0.63 |
| meanAge | 1.42e-01 | 1  | 0.71 |
| GLOBAL  | 1.64e+00 | 5  | 0.90 |
